# Supplementary material for: The Immunomodulatory Effect of Triptolide on Mesenchymal Stromal Cells
Source: PubMed Central journal article supplement (PMC8415460; doi:10.3389/fimmu.2021.686356), 2021-08-16
Supplement: Table_1.pdf [file Table_1.pdf]

**Table1.****Mean fluorescent intensity of surface marker on UC-MSCs and TPL-primed UC-MSCs**

|                       | CD73           |               | CD105         |                | CD90            |                | CD44           |                | HLA-ABC        |                | CD45        |             | CD34        |             | CD11b       |             | CD19         |              | HLA-DR       |              |
|-----------------------|----------------|---------------|---------------|----------------|-----------------|----------------|----------------|----------------|----------------|----------------|-------------|-------------|-------------|-------------|-------------|-------------|--------------|--------------|--------------|--------------|
| TPL-primed            | -              | +             | -             | +              | -               | +              | -              | +              | -              | +              | -           | +           | -           | +           | -           | +           | -            | +            | -            | +            |
| M.F.I.<br>Mean<br>±SD | 169.3<br>±10.5 | 166.0<br>±7.2 | 226.0<br>±7.1 | 214.5<br>±14.9 | 471.50<br>±45.9 | 483.0<br>±28.3 | 289.0<br>±14.5 | 266.3<br>±30.6 | 181.3<br>±16.8 | 184.0<br>±14.5 | 5.2<br>±1.1 | 5.2<br>±0.9 | 6.3<br>±1.0 | 7.1<br>±2.4 | 6.5<br>±0.4 | 6.9<br>±0.6 | 13.6<br>±9.5 | 13.5<br>±8.6 | 10.5<br>±5.6 | 11.1<br>±5.8 |

Mean fluorescent intensity; M.F.I., n=3, *p=not significant*
