# Supplementary material for: The Immunomodulatory Effect of Triptolide on Mesenchymal Stromal Cells
Source: PubMed Central journal article supplement (PMC8415460; doi:10.3389/fimmu.2021.686356), 2021-08-16
Supplement: Table_2.pdf [file Table_2.pdf]

**Table 2.****The gene expressions of HLA-A, HLA-B, and HLA-C in UC-MSCs by microarray analysis**

| Gene Symbol | TPL-primed UC-MSC to UC-MSC (No33 lot) | IFN- $\gamma$ -primed UC-MSC to UC-MSC (No33) | IFN- $\gamma$ and TPL-primed UC-MSC to UC-MSC (No33) | TPL-primed UC-MSC to UC-MSC (No35 lot) | IFN- $\gamma$ -primed UC-MSC to UC-MSC (No35) | IFN- $\gamma$ and TPL-primed UC-MSC to UC-MSC (No35) |                   |
|-------------|----------------------------------------|-----------------------------------------------|------------------------------------------------------|----------------------------------------|-----------------------------------------------|------------------------------------------------------|-------------------|
|             | SET01 Log2ratio                        | SET02 Log2ratio                               | SET03 Log2ratio                                      | SET04 Log2ratio                        | SET05 Log2ratio                               | SET06 Log2ratio                                      | Probe Set ID      |
| HLA-A       | -0.28363                               | 3.82366                                       | 3.198158                                             | -1.04817                               | 4.031767                                      | 2.688925                                             | TC0600007495.hg.1 |
| HLA-B       | 0.696424                               | 4.998448                                      | 4.458509                                             | -0.62117                               | 4.512793                                      | 4.090449                                             | TC0600014258.hg.1 |
| HLA-C       | 0.041696                               | 3.792738                                      | 3.291949                                             | -1.51609                               | 3.934149                                      | 2.963895                                             | TC0600014257.hg.1 |
